# Supplementary material
Source: publisher site journal article supplement (http://kjim.org/upload/media/kjim-2022-035-suppl1.pdf)
Supplement: Supplementary file 1 [file kjim-2022-035-suppl1.pdf]

**Supplementary Table 1. Comparison of the clinical responder and nonresponder groups**

| Variable                                             | Clinical responder group<br>(n = 56) | Nonresponder group<br>(n = 44) | p value |
|------------------------------------------------------|--------------------------------------|--------------------------------|---------|
| Age at BDP administration, median (IQR), yr          | 51 (35.3 to 57.0)                    | 35 (29.3 to 46.0)              | 0.005   |
| Sex                                                  |                                      |                                | 0.325   |
| Male                                                 | 25 (44.6)                            | 24 (54.5)                      |         |
| Female                                               | 31 (55.4)                            | 20 (45.5)                      |         |
| Smoking status at IBD diagnosis                      |                                      |                                | 0.912   |
| Current smoker                                       | 9 (16.1)                             | 6 (13.6)                       |         |
| Ex-smoker                                            | 10 (17.9)                            | 9 (20.5)                       |         |
| Never                                                | 37 (66.1)                            | 29 (65.9)                      |         |
| Disease extent at BDP initiation                     |                                      |                                | 0.732   |
| Proctitis                                            | 9 (16.1)                             | 5 (11.4)                       |         |
| Left-sided colitis                                   | 25 (44.6)                            | 19 (43.2)                      |         |
| Extensive colitis                                    | 22 (39.3)                            | 20 (45.5)                      |         |
| Disease duration, median (IQR), yr                   | 11 (6.0 to 18.0)                     | 10 (6.0 to 15.0)               | 0.398   |
| Disease activity                                     |                                      |                                | 0.102   |
| Mild                                                 | 35 (62.5)                            | 19 (43.2)                      |         |
| Moderate                                             | 21 (37.5)                            | 24 (54.5)                      |         |
| Severe                                               | 0                                    | 1 (2.3)                        |         |
| Initial partial Mayo score, mean (IQR)               | 4.1 (3.0 to 6.0)                     | 4.5 (3.0 to 5.0)               | 0.197   |
| Change in the stool frequency subscore, mean (range) | -0.86 (-1.0 to 0.0)                  | 0.05 (-2.0 to 2.0)             | < 0.001 |
| Change in the rectal bleeding subscore, mean (range) | -1.04 (-2.0 to 0.0)                  | -0.07 (-3.0 to 2.0)            | < 0.001 |
| Past medication history                              |                                      |                                | 0.322   |
| 5-ASA alone                                          | 42 (75.0)                            | 29 (65.9)                      |         |
| IMM                                                  | 13 (23.2)                            | 11 (25.0)                      |         |
| Biologics                                            | 0                                    | 2 (4.5)                        |         |
| IMM + biologics                                      | 1 (1.8)                              | 2 (4.5)                        |         |
| Concomitant drugs                                    |                                      |                                | 0.989   |
| 5-ASA alone                                          | 7 (12.5)                             | 5 (11.4)                       |         |
| Rectal therapy alone                                 | 1 (1.8)                              | 1 (2.3)                        |         |
| 5-ASA + rectal therapy                               | 36 (64.3)                            | 28 (63.6)                      |         |
| 5-ASA + IMM                                          | 4 (7.1)                              | 2 (4.5)                        |         |
| 5-ASA + biologics                                    | 1 (1.8)                              | 1 (2.3)                        |         |
| 5-ASA + rectal therapy + IMM                         | 7 (12.5)                             | 7 (15.9)                       |         |

Values are presented as number (%) unless otherwise indicated.

BDP, beclomethasone dipropionate; IQR, interquartile range; IBD, inflammatory bowel disease; 5-ASA, 5-aminosalicylic acid; IMM, immunomodulator.
